# Supplementary material for: Ultrahigh Density of Atomic CoFe-Electron Synergy in Noncontinuous Carbon Matrix for Highly Efficient Magnetic Wave Adsorption
Source: PubMed Central journal article supplement (PMC8986902; doi:10.1007/s40820-022-00830-8), 2022-04-06
Supplement: 40820_2022_830_MOESM1_ESM.pdf [file 40820_2022_830_MOESM1_ESM.pdf]

Supporting Information for

## Ultrahigh Density of Atomic CoFe-Electron Synergy in Noncontinuous Carbon Matrix for Highly Efficient Magnetic Wave Adsorption

Wenhuan Huang<sup>1, \*</sup>, Qiang Qiu<sup>1</sup>, Xiufang Yang<sup>1</sup>, Shouwei Zuo<sup>1</sup>, Jianan Bai<sup>1</sup>, Huabin Zhang<sup>2, \*</sup>, Ke Pei<sup>3</sup>, and Renchao Che<sup>3, \*</sup>

<sup>1</sup>Key Laboratory of Chemical Additives for China National Light Industry, College of Chemistry and Chemical Engineering, Shaanxi University of Science and Technology, Xi'an 710021, P. R. China

<sup>2</sup>KAUST Catalysis Center, King Abdullah University of Science and Technology, 23955-6900, Thuwal, Kingdom of Saudi Arabia

<sup>3</sup>Laboratory of Advanced Materials, Shanghai Key Lab of Molecular Catalysis and Innovative Materials, Fudan University, Shanghai 200438, P. R. China

\*Corresponding authors. E-mail: [huangwenhuan@sust.edu.cn](mailto:huangwenhuan@sust.edu.cn) (Wenhuan Huang), [huabin.zhang@kaust.edu.sa](mailto:huabin.zhang@kaust.edu.sa) (Huabin Zhang), [rcche@fudan.edu.cn](mailto:rcche@fudan.edu.cn) (Renchao Che)

### S1 Experimental Section

#### S1.1 Synthesis of MET

The synthesis of MET is according to the literature [S1]. ZnCl<sub>2</sub> (5.0 g) was dissolved in a mixture of ethanol (50 mL), water (75 mL), ammonium hydroxide (25%-28%, 20 mL) and N, N-dimethylformamide (DMF, 50 mL), and then kept stirring for 10 min. After that, 1H-1,2,3-triazole (6.26 mL) was slowly dropped in the solution during stirring. After a 24-hours stirring at room temperature, the white product of MET was generated and filtered out. After three times washes by ethanol, the product was dried at 80 °C for 8 h with a yield of 90%.

#### S1.2 Synthesis of CoFe@MET, Fe@MET, and Co@MET

For synthesizing CoFe@MET, Co(CH<sub>3</sub>COO)<sub>2</sub>·6H<sub>2</sub>O (0.72 g) and FeCl<sub>2</sub> (0.49 g) in a molar ratio of 1:1 were first dissolved in 200 mL methanol as a metal solution. Then, MET (2.0 g) powder was immersed into above solution, and then stirred at room temperature for 6 h. The pink powder was filtered out and washed by ethanol for three times. After the vacuum drying at 60 °C for 8h, the CoFe@MET was collected with a yield of 62%.

The Fe@MET and Co@MET were synthesized, as contrast samples, for investigating the internal Co-Fe synergistic effect and microwave absorbing mechanism. The synthesis of reseda Fe@MET (yield of 67%) and pink Co@MET (yield of 63%) were obtained in the similar way with CoFe@MET, except form the metal solutions are instead of FeCl<sub>2</sub> (0.98 g FeCl<sub>2</sub> in 200 mL methanol) and Co(CH<sub>3</sub>COO)<sub>2</sub>·6H<sub>2</sub>O (1.44 g Co(CH<sub>3</sub>COO)<sub>2</sub>·6H<sub>2</sub>O in 200 mL methanol) solutions.

#### S1.3 Synthesis of and CoFe@PCS, Fe@PCS, Co@PCS

The as-prepared 2.0 g CoFe@MET was put into the ceramic boat and then placed in the programmed tube furnace. It was heated up to 900 °C at a heating rate of 5 °C min<sup>-1</sup> under the nitrogen atmosphere. After that, the furnace was kept at 900 °C for two hours and then naturally cooled to room temperature. The ultra-light black powder of CoFe@PCS (0.16g) was successfully synthesized. The Fe@PCS and Co@PCS were

synthesized at the same condition by using Fe@MET and Co@MET as precursors.

## S2 Characterizations

D8 DAVANCI X-ray powder diffractometer equipped with graphite monochromatized Cu K $\alpha$  radiation ( $\lambda = 0.1542$  nm) was used to record powder X-ray diffraction (PXRD) patterns in the  $2\theta$  range of  $5^\circ$ - $80^\circ$  with a scanning rate of  $1^\circ/\text{min}$ . The Brunauer-Emmett-Teller (BET) method was employed to calculate the specific surface area through nitrogen adsorption and desorption at 77 K by ASAP 2020 sorption system. Scanning electron microscopy (SEM) images were collected by a Hitachi S4800 apparatus with an acceleration voltage of 2 kV. The transmission electron microscopy (TEM) images were recorded on JEM-2100F, JEM-2010HR, and FEI Talos F200X, working at an accelerating voltage of 200 kV and X-ray energy-dispersive spectroscopy (EDS) was taken on a JEM-2010HR-Vantage typed energy spectrometer. X-ray photoelectron spectroscopy (XPS) was implemented on Thermo ESCA Lab250XI. Raman spectroscopy of the samples was obtained by a Renishaw in Via Raman Microscope. The electromagnetic parameters were analyzed using a HP8753D vector network analyzer in the frequency range of 2-18 GHz. The measured samples were dispersed in paraffin homogeneously with a sample-to-paraffin weight ratio of 3:17, and then the mixture was pressed into a toroidal shape with an inner diameter of 2.0 mm and an outer diameter of 7.0 mm. The conductivity of the samples ( $1 \times 1 \text{ cm}^2$ ) was performed through a ST2253 four-probe resistance meter. The hysteresis loop of the materials was tested by superconducting quantum interference device MPMS(SQUID) VSM magnetometer. The absorption spectra of Mo-edge were collected in a transmission mode at room temperature using a Si (111) double crystal monochromator at the 1W1B station of Beijing Synchrotron Radiation Facility (BSRF, Beijing).

## S3 Data Calculations

The reflection loss ( $RL$ ) values of the absorbers are calculated according to transmission line theory by the following Eqs. S1-S2 [S2]:

$$R_L(dB) = 20 \lg \left| \frac{Z_{in} - Z_0}{Z_{in} + Z_0} \right| \quad (S1)$$

$$Z_{in} = Z_0 \sqrt{\frac{\mu_r}{\epsilon_r}} \tanh \left[ j \left( \frac{2\pi f d}{c} \right) \sqrt{\mu_r \epsilon_r} \right] \quad (S2)$$

Where  $Z_0$  is the characteristic impedance of free space,  $Z_{in}$  is the normalized input impedance of absorber,  $\epsilon_r$  and  $\mu_r$  are the relative complex permittivity and permeability,  $d$  is the layer thickness,  $c$  is the speed of light in free space and  $f$  is the frequency.

SRL is calculated based on RL value, considering the filler loading amount and the layer thickness [S3].

$$SR_L = RL / (\text{filler loading} \times \text{thickness}) \quad (S3)$$

Where filler loading is the wt % in test ring.

The attenuation coefficient ( $\alpha$ ) [S4]:

$$\alpha = \frac{\sqrt{2\pi f}}{C} \sqrt{(\mu''\epsilon'' - \mu'\epsilon') + \sqrt{(\mu''\epsilon'' - \mu'\epsilon')^2 + (\mu'\epsilon'' + \mu''\epsilon')^2}} \quad (S4)$$

Cole–Cole semicircle model (Eq. S5) [S5]:

$$\left( \epsilon' - \frac{\epsilon_s + \epsilon_\infty}{2} \right)^2 + (\epsilon'')^2 = \left( \frac{\epsilon_s - \epsilon_\infty}{2} \right)^2 \quad (S5)$$

Each semicircle in the  $\epsilon' - \epsilon''$  curve stands for a polarization relaxation process. The  $\epsilon_s$  and  $\epsilon_\infty$  represent the static dielectric constant, the dielectric constant at infinite frequency, respectively. The high number of semicircles means the strong dipole polarization process.

Debye relaxation correction formula (Eqs. S6-S7) [S6]:

$$\varepsilon_r = \varepsilon_{r\infty} + \frac{\varepsilon_{rs} - \varepsilon_{r\infty}}{1 + (i\omega\tau)^{1-A}} \quad (0 < A < 1) \quad (S6)$$

$$\varepsilon_r' = \varepsilon_{r\infty} + (\varepsilon_{rs} - \varepsilon_{r\infty}) \frac{1 + (\omega\tau)^{(1-A)} \sin \frac{\pi A}{2}}{1 + 2(\omega\tau)^{1-A} \sin \frac{\pi A}{2} + (\omega\tau)^{2(1-A)}} \quad (S7)$$

$\varepsilon_p''$  and  $\varepsilon_c''$  are the dielectric loss contributed by polarization relaxation and charge transport, respectively, which can be obtained according to Debye theory (Eqs. S8-S10).

$$\varepsilon'' = \frac{\varepsilon_s - \varepsilon_\infty}{1 + (2\pi f)^2 \tau^2} \omega\tau + \frac{\sigma}{2\pi f \varepsilon_0} = \varepsilon_p'' + \varepsilon_c'' \quad (S8)$$

$$\varepsilon_c'' = \frac{\sigma}{2\pi f \varepsilon_0} \quad (S9)$$

$$\varepsilon_p'' = \frac{\varepsilon_s - \varepsilon_\infty}{1 + (2\pi f)^2 \tau^2} \omega\tau = \varepsilon'' - \varepsilon_c'' \quad (S10)$$

Where  $\varepsilon_s$  is the relative permittivity at static, and  $\varepsilon_\infty$  is at “infinite” high frequency.  $\sigma$  is the conductivity, Conductivity is a parameter used to describe the difficulty of charge flow in matter [S7].

$$(C_0 = \mu'(\mu'')^{-2}(f)^{-1} = 2\Pi\mu_0 d^2 \sigma / 3) \quad (S11)$$

## S4 Supplementary Results and Discussion

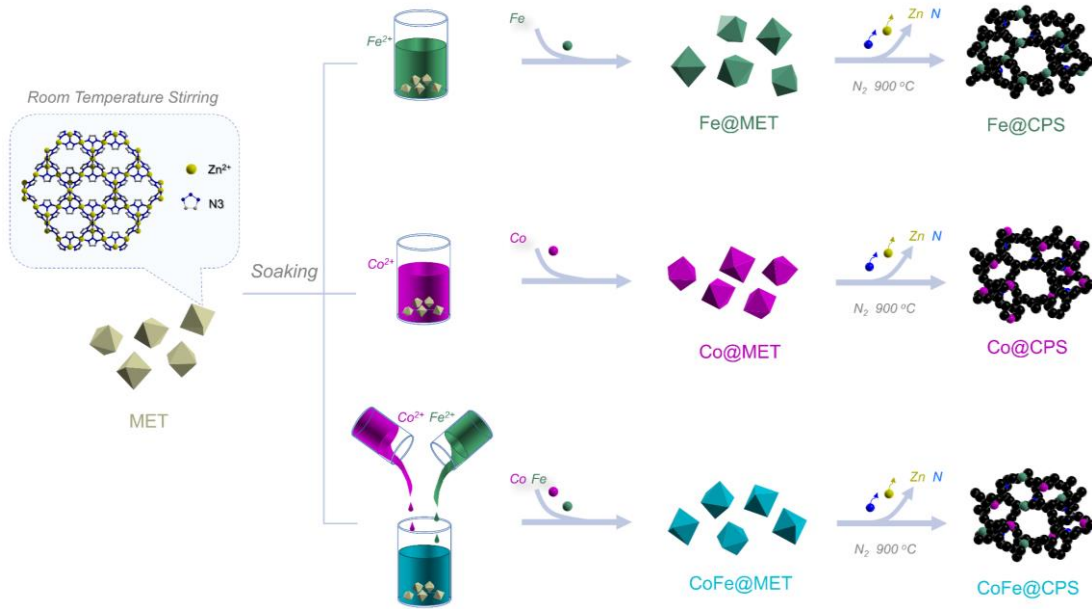

**Fig. S1** The scheme of the synthesis routes for all the samples in this work

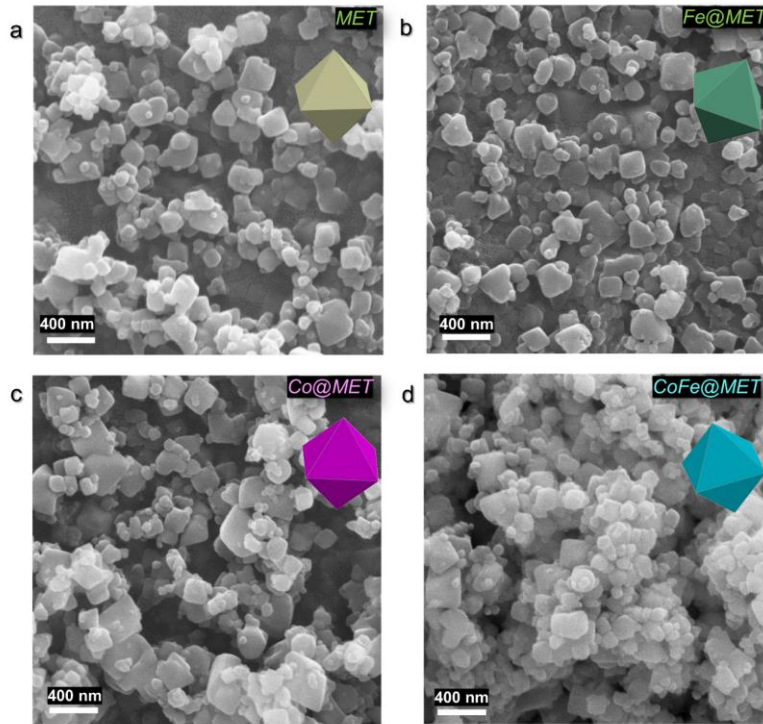

**Fig. S2** SEM of (a) MET, (b) Fe@MET, (c) Co@MET and (d) CoFe@MET

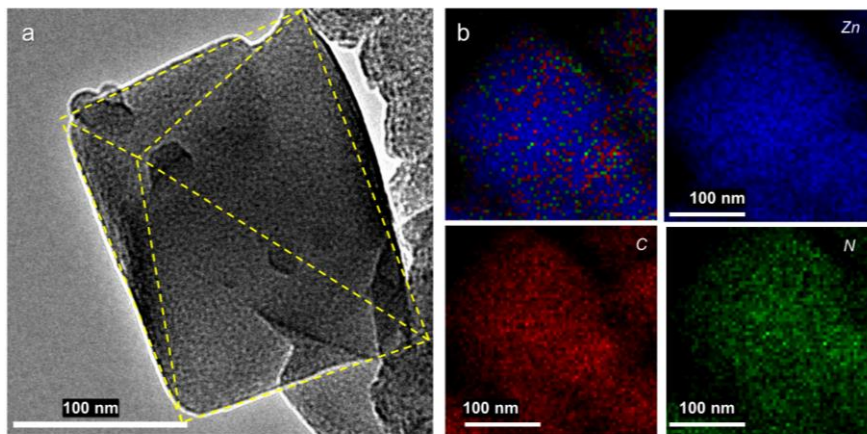

**Fig. S3** TEM (a) and the TEM-EDS mapping (b) of MET

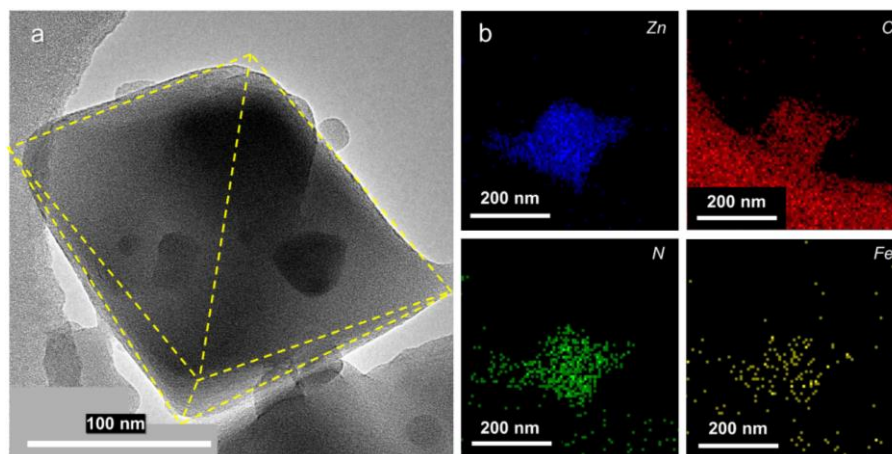

**Fig. S4** TEM (a) and EDS mapping (b) of Fe@MET

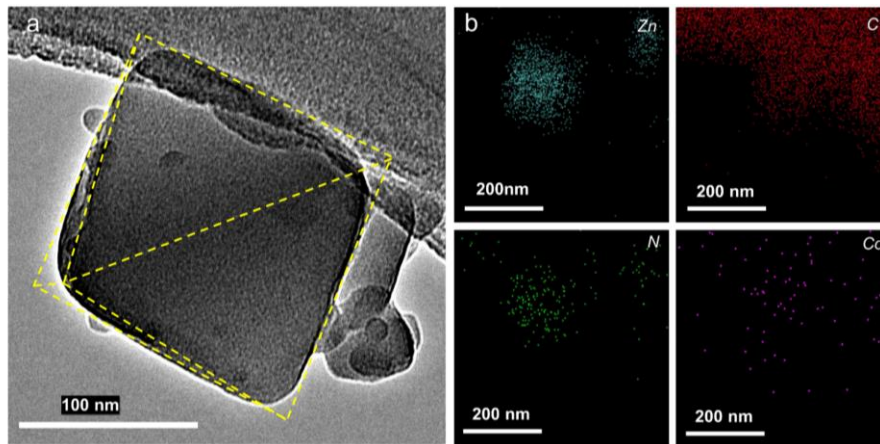

**Fig. S5** TEM (a) and EDS mapping (b) of Co@MET

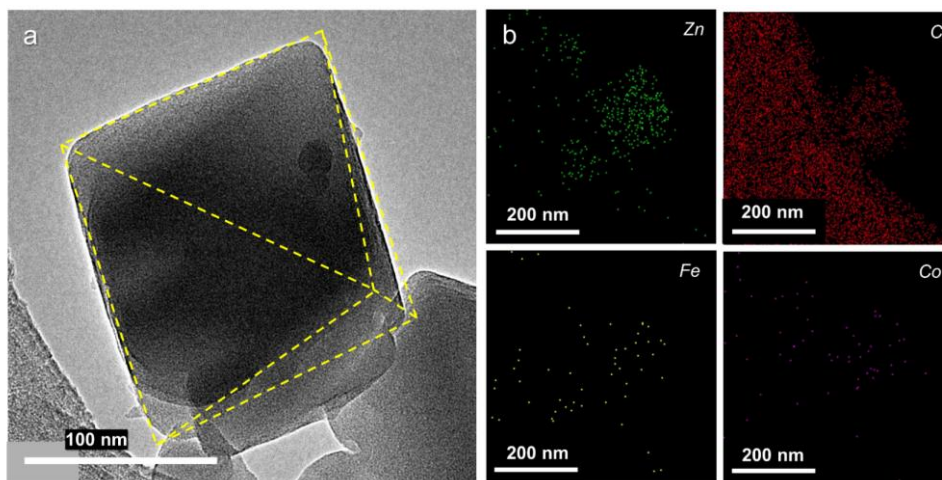

**Fig. S6** TEM (a) and EDS mapping (b) of CoFe@MET

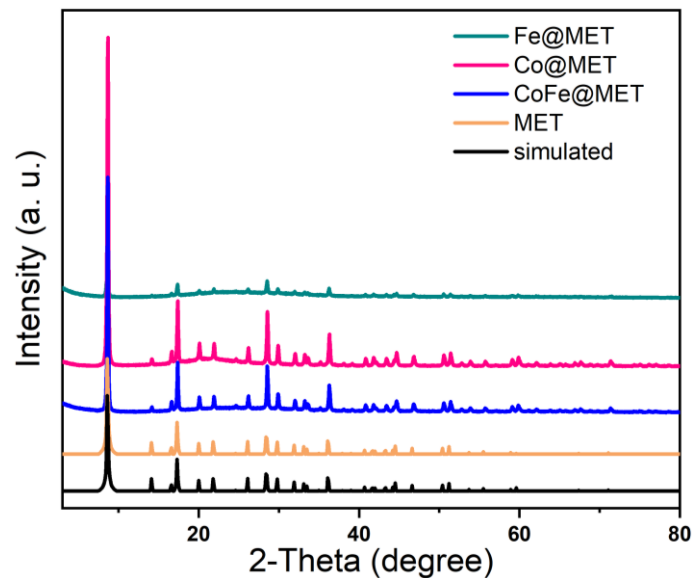

**Fig. S7** PXRD results of synthesized MET, Fe@MET, Co@MET, CoFe@MET and the simulated curves of MET crystals (CCDC: 837471)

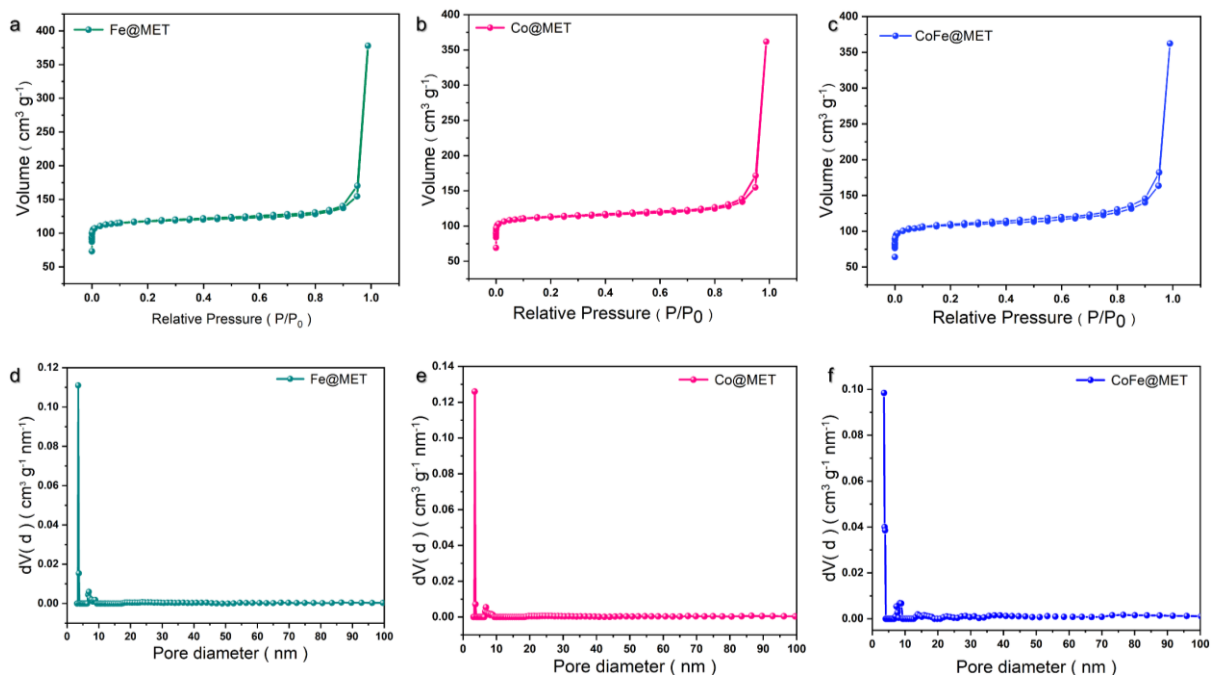

**Fig. S8** (a-c) N<sub>2</sub> sorption isotherms (77 K) for Fe@MET (a), Co@MET (b), and CoFe@MET (c), and (d-f) Pore diameter distribution curves for Fe@MET (d), Co@MET (e), and CoFe@MET (f)

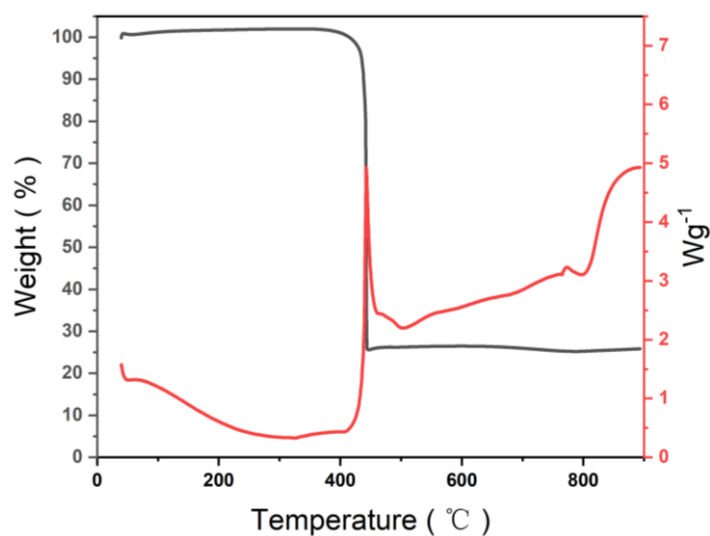

**Fig. S9** The DSC and TGA curves of CoFe@MET under nitrogen atmosphere at the range of Room temperature to 900 °C

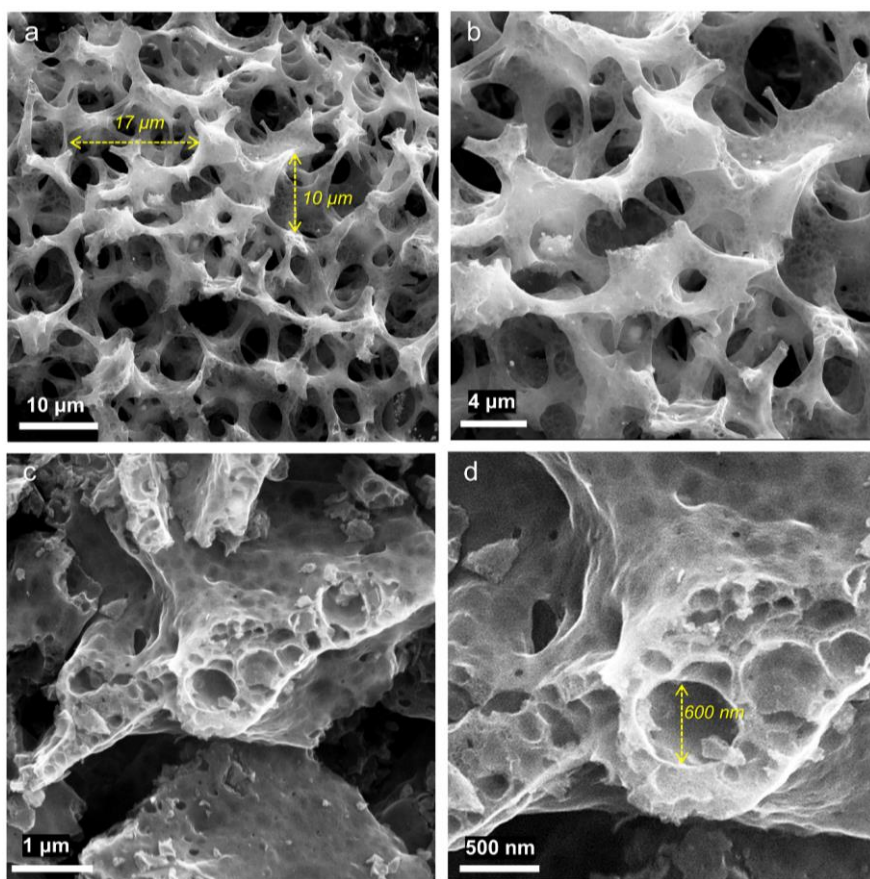

Fig. S10 SEM (a-d) of Fe@PCS

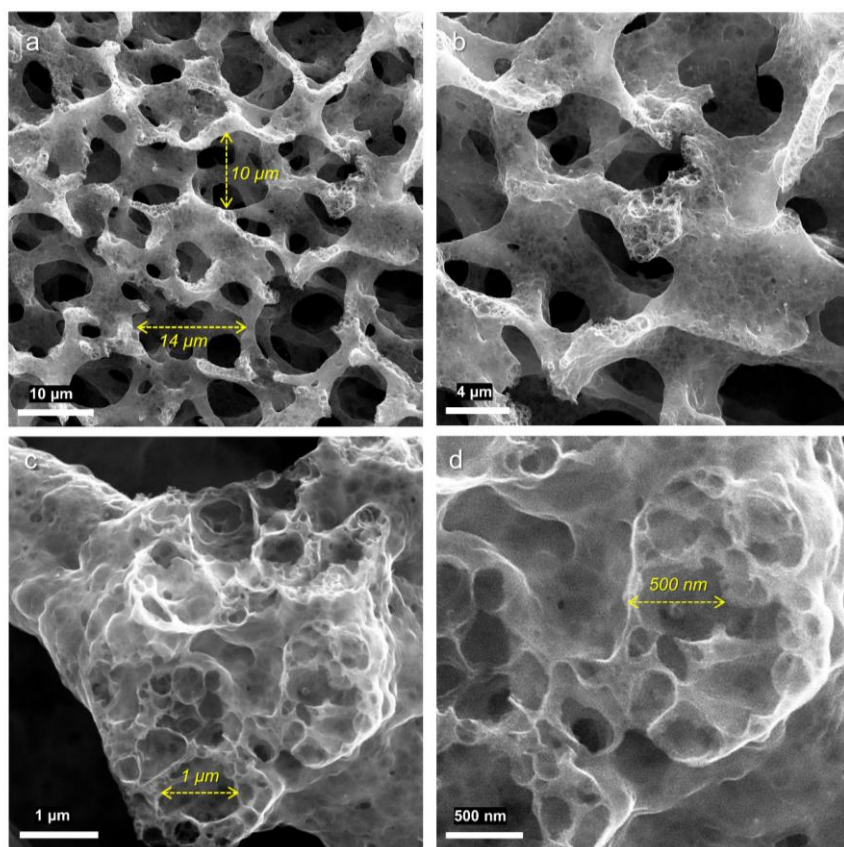

Fig. S11 SEM (a-d) of Co@PCS

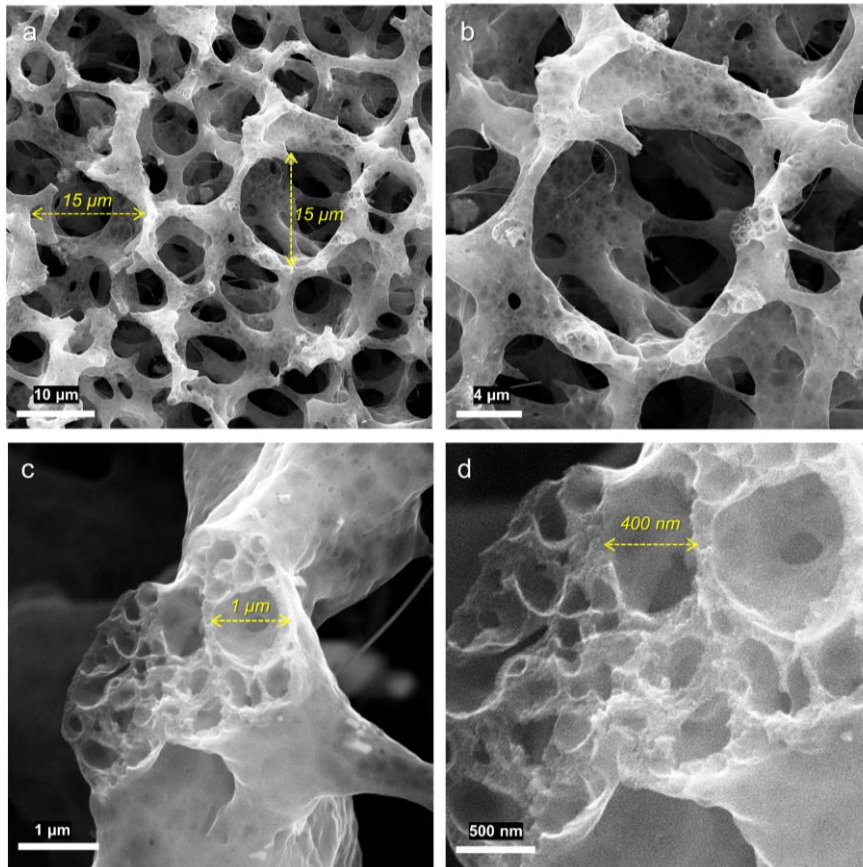

Fig. S12 SEM (a-d) of CoFe@PCS

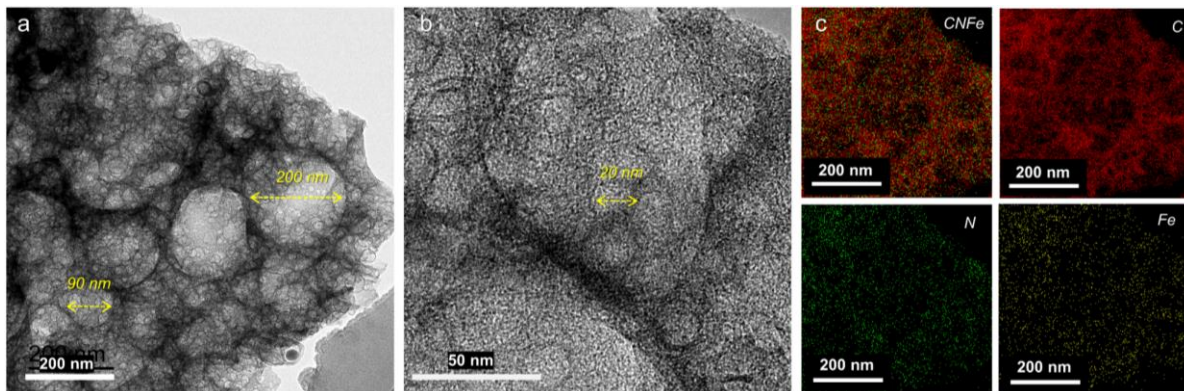

Fig. S13 TEM (a-b) and mapping (c) of Fe@PCS

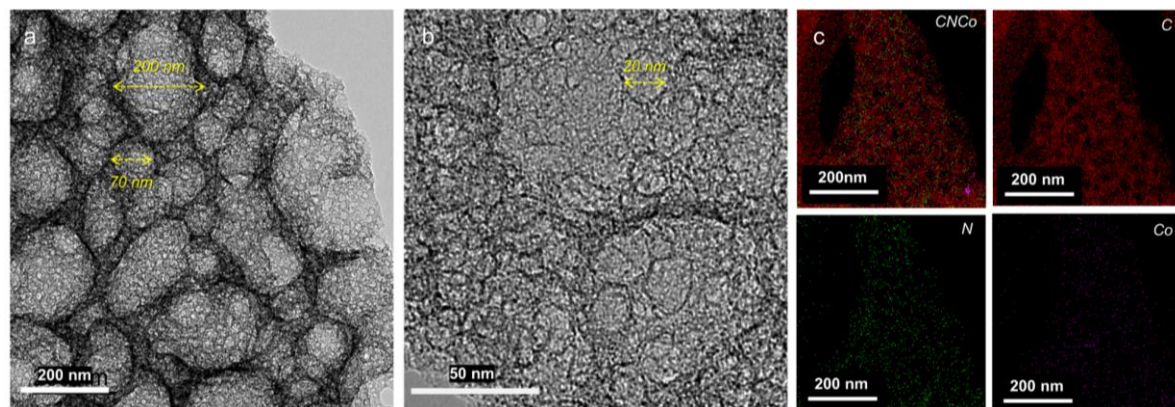

Fig. S14 TEM (a-b) and EDS mapping (c) of Co@PCS



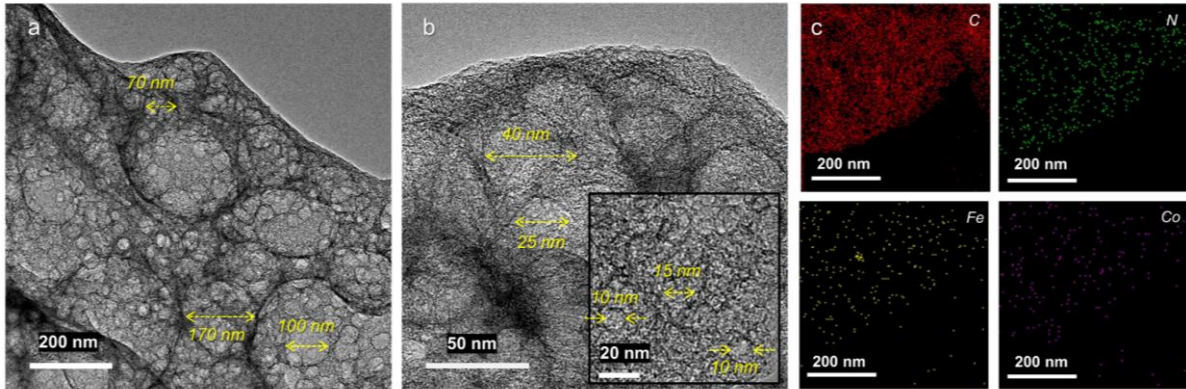

**Fig. S15** TEM (a-b) and EDS mapping (c) of CoFe@PCS

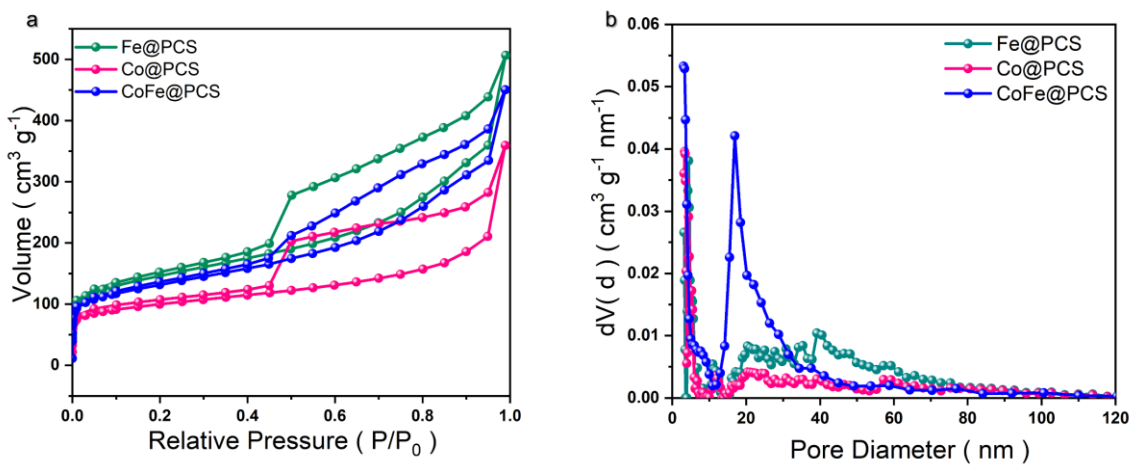

**Fig. S16** (a) N<sub>2</sub> sorption isotherms (77 K) for Fe@PCS, Co@PCS, CoFe@PCS. (b) Pore diameter distribution curves for Fe@PCS, Co@PCS, CoFe@PCS

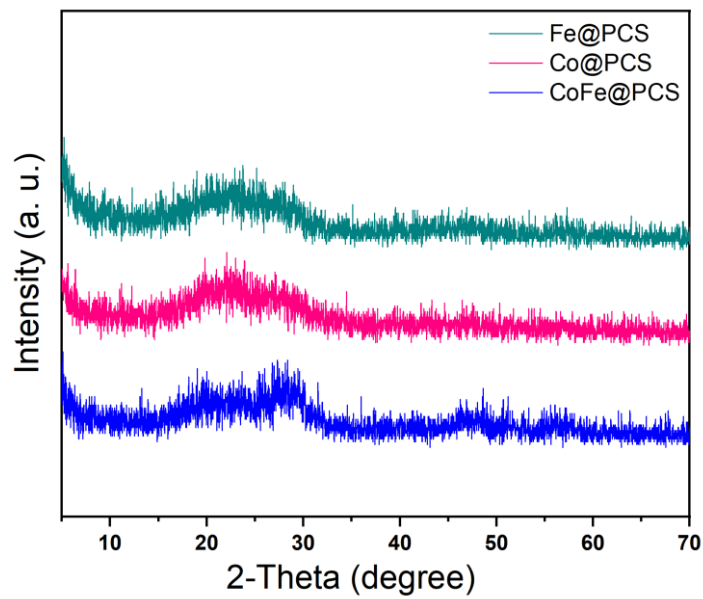

**Fig. S17** PXRD of Fe@PCS, Co@PCS, and CoFe@PCS

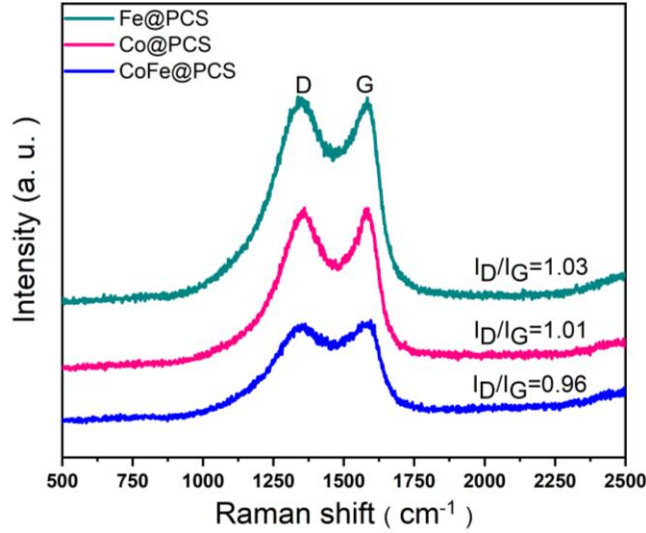

**Fig. S18.** Raman spectra for Fe@PCS, Co@PCS, CoFe@PCS

**Table S1** ICP-OES results of of Fe@PCS, Co@PCS and CoFe@PCS

|    | Fe@PCS | Co@PCS | CoFe@PCS |
|----|--------|--------|----------|
| Co | -      | 0.602  | 0.344    |
| Fe | 0.672  | -      | 0.316    |

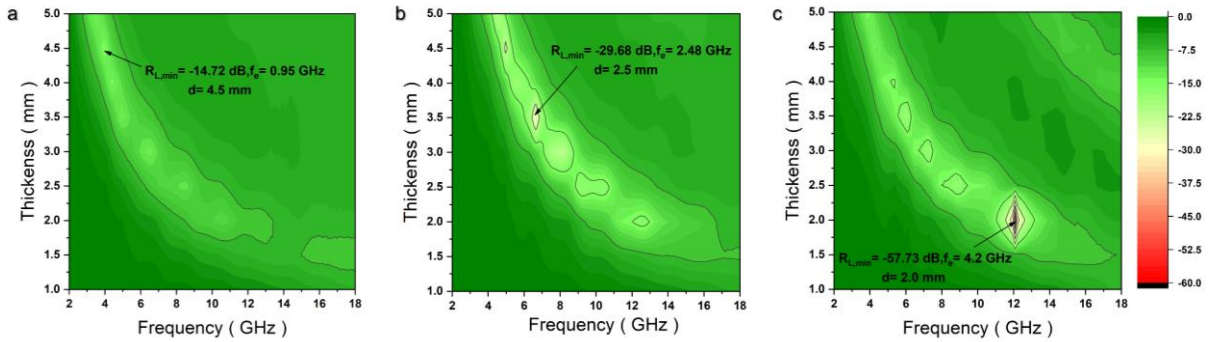

**Fig. S19** 2D contour map of RL for Fe@PCS (a), Co@PCS(b), CoFe@PCS(c)

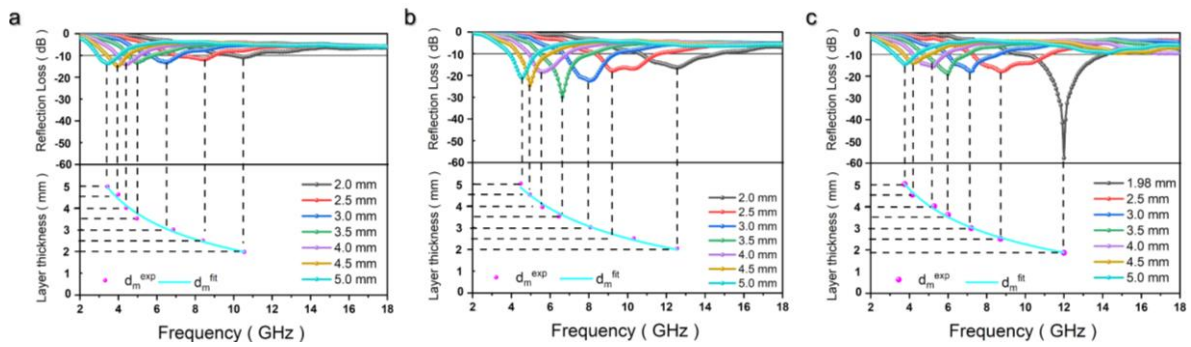

**Fig. S20** The best of RL values and the effective frequency bandwidth (RL < -10 dB) of Fe@PCS (a), Co@PCS (b), CoFe@PCS (c). The experimental and theoretical fitted  $d_m$  values of Fe@PCS (d), Co@PCS (e), CoFe@PCS (f)

## Nano-Micro Letters

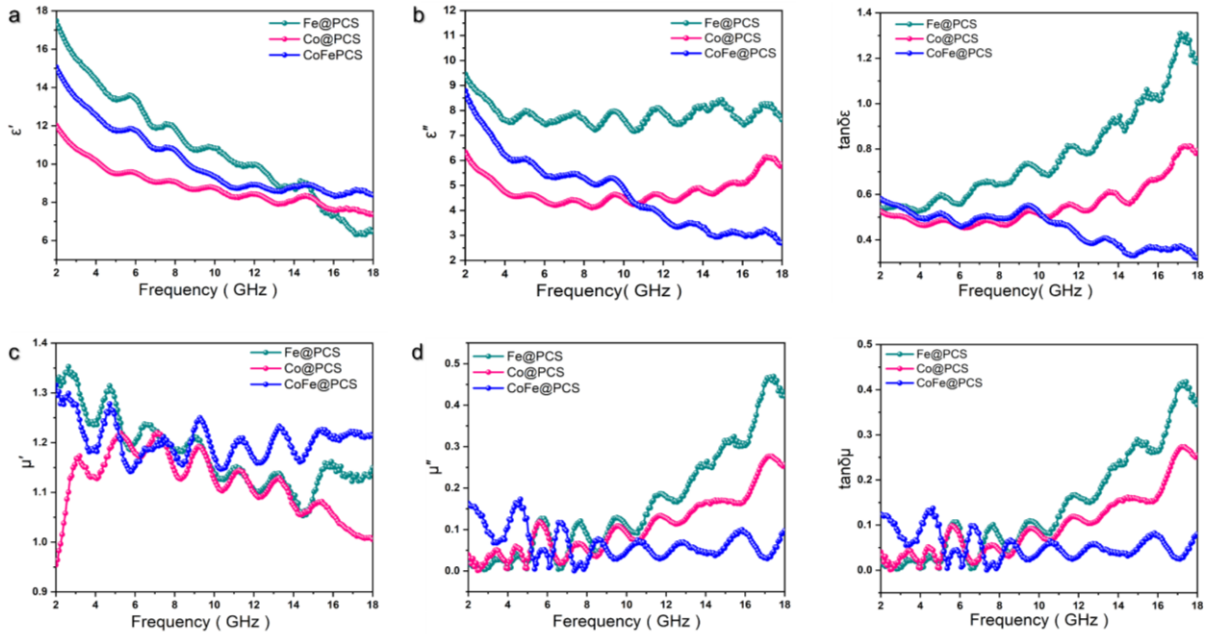

**Fig. S21** The real part of permittivity (a), imaginary part of permittivity (b), dielectric loss tangent (c), real part of permeability (d), imaginary part of permeability (e) and magnetic loss tangent of Fe@PCS, Co@PCS and CoFe@PCS

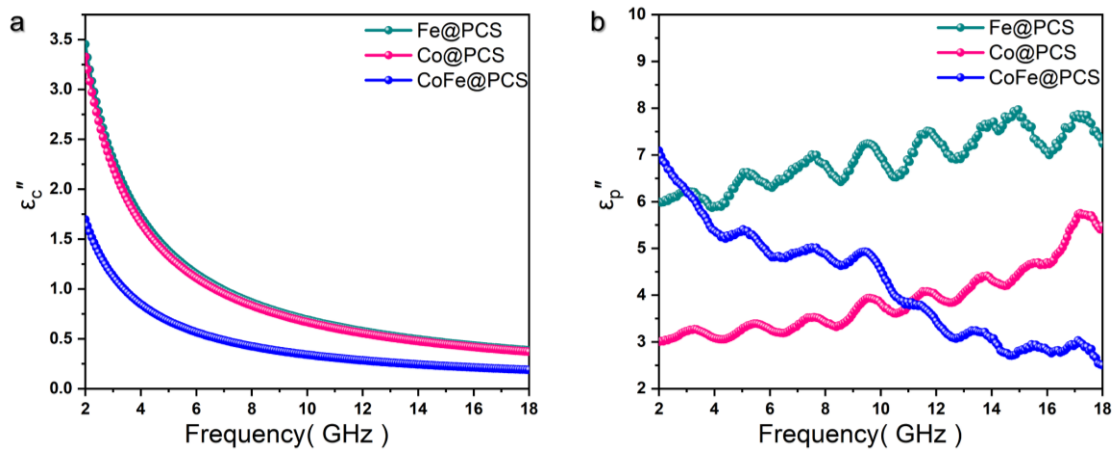

**Fig. S22** The calculated  $\epsilon''_p$  (a) and  $\epsilon''_c$  (b) of Fe@PCS, Co@PCS and CoFe@PCS

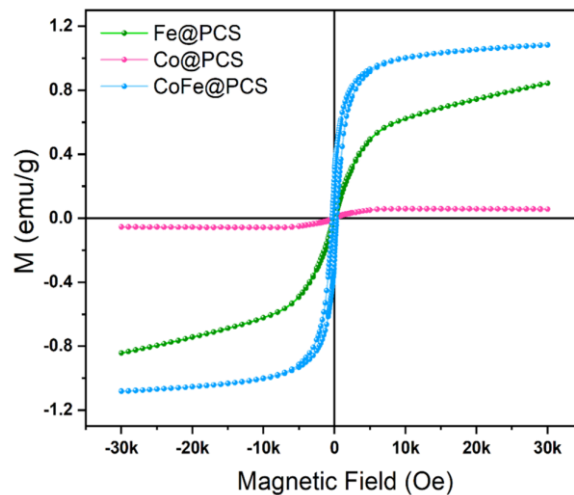

**Fig. S23** The magnetic hysteresis loop of Fe@PCS, Co@PCS and CoFe@PCS

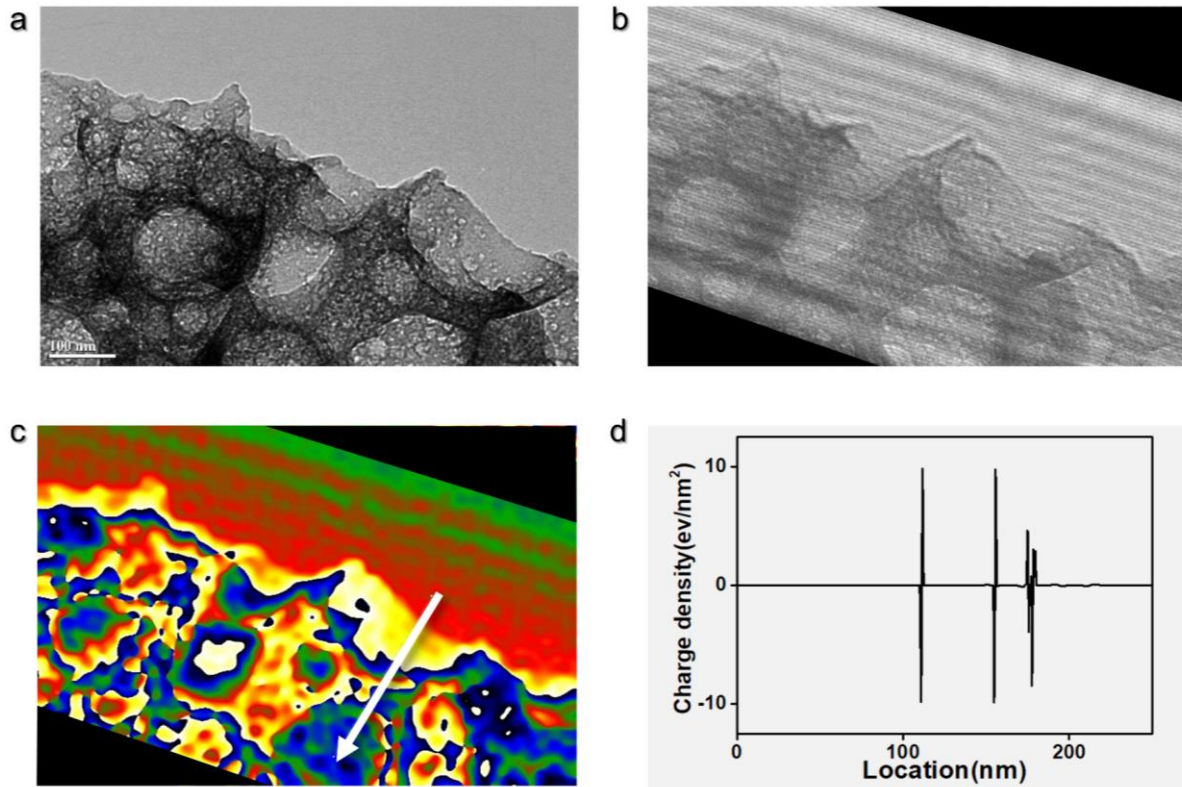

**Fig. S24** HR-TEM and its corresponding hologram images (**a-b**), charge density map (**c**), the profile of charge density in the region along the white arrow (**d**) of Fe@PCS

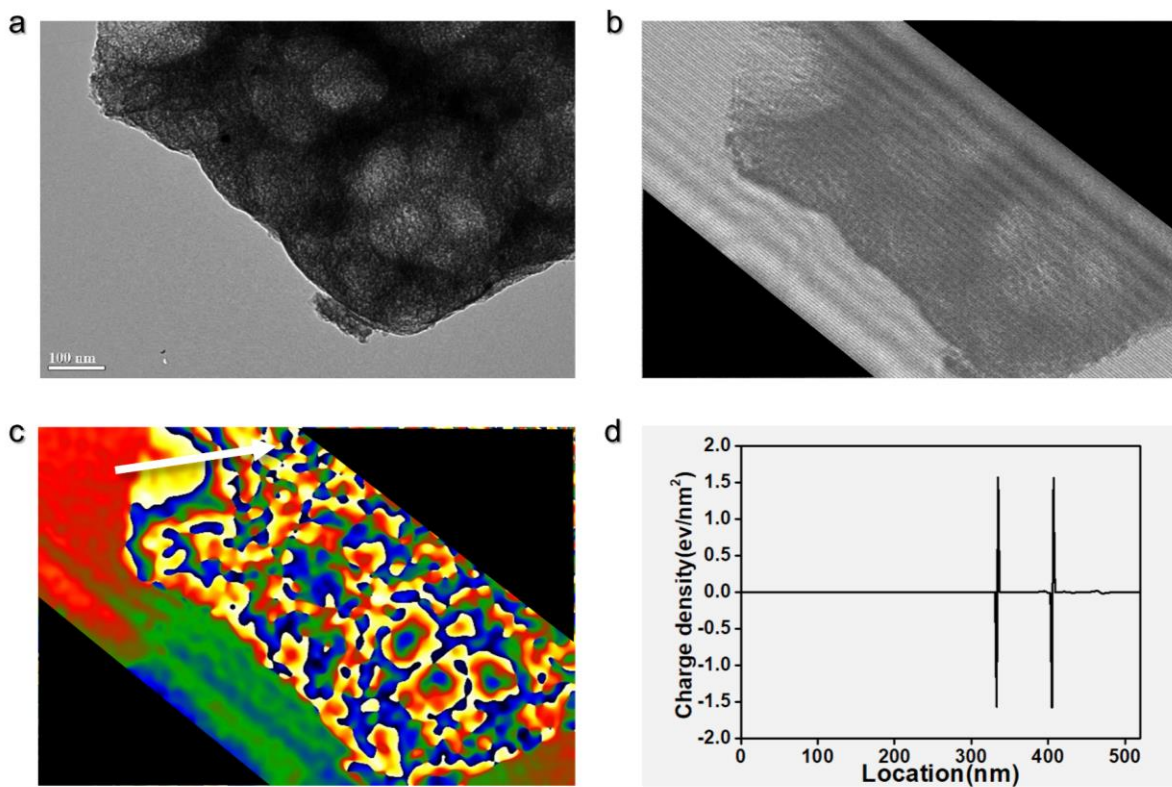

**Fig. S25** HR-TEM and its corresponding hologram images (**a-b**), charge density map (**c**), the profile of charge density in the region along the white arrow (**d**) of Co@PCS

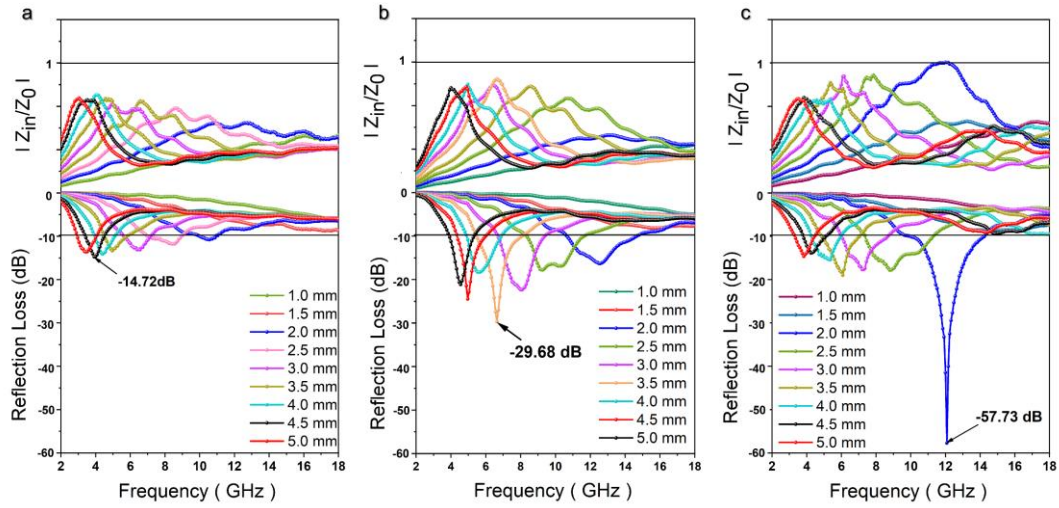

**Fig. S26**  $|Z_{in}/Z_0|$  and RL plots of Fe@PCS, Co@PCS and CoFe@PCS

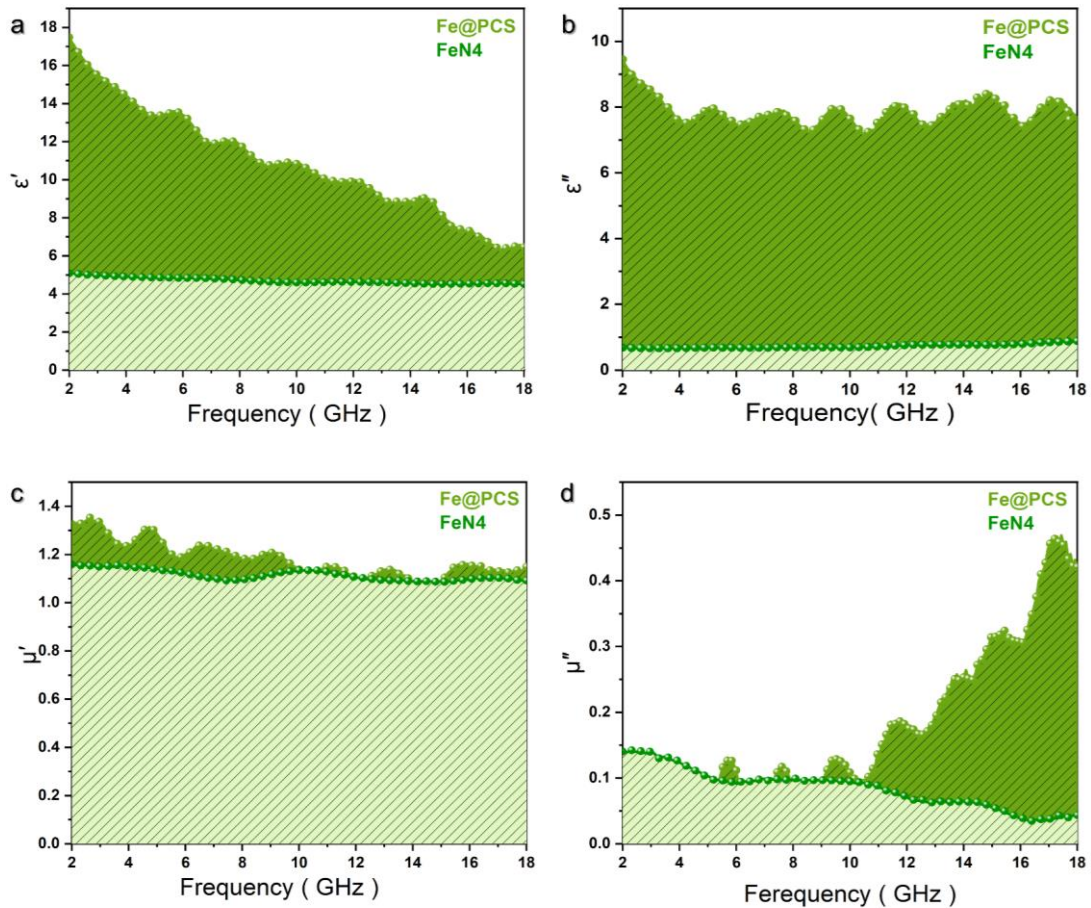

**Fig. S27**  $\epsilon'$ ,  $\epsilon''$ ,  $\mu'$  and  $\mu''$  contribution of Fe-N<sub>4</sub> in Fe@PCS

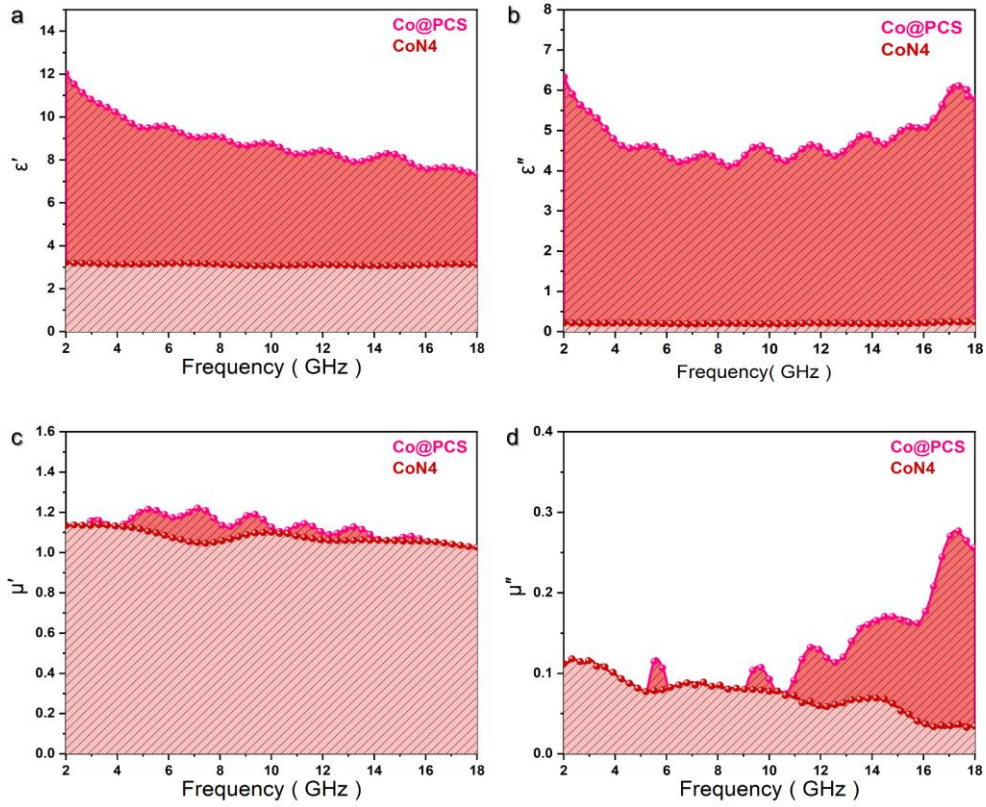

**Fig. S28**  $\epsilon'$ ,  $\epsilon''$ ,  $\mu'$  and  $\mu''$  contribution of Co-N<sub>4</sub> in Co@PCS

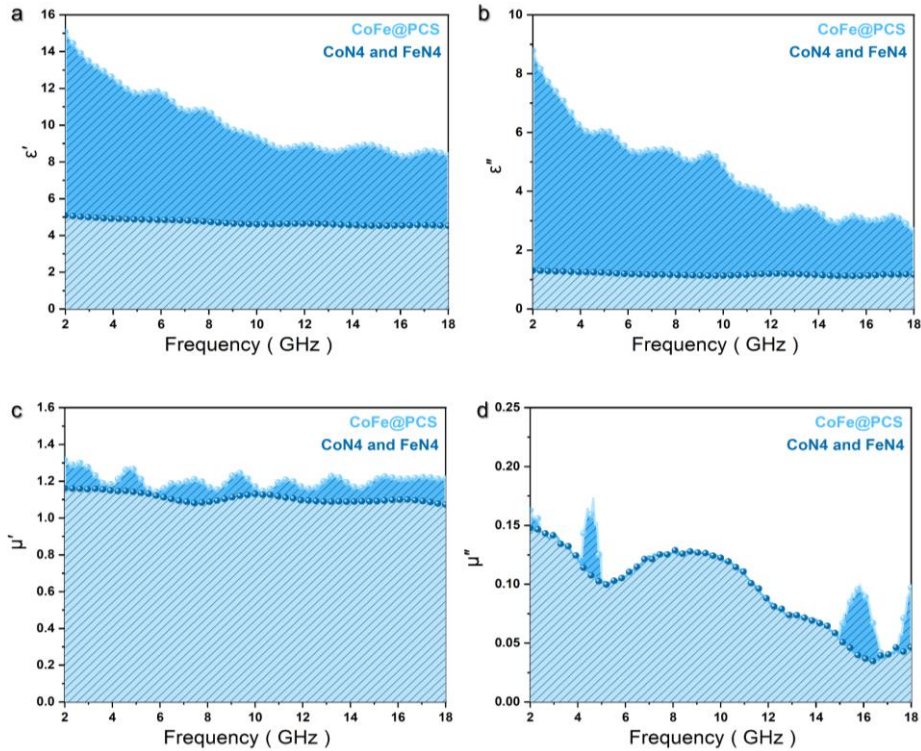

**Fig. S29**  $\epsilon'$ ,  $\epsilon''$ ,  $\mu'$  and  $\mu''$  contribution of Fe/Co-N<sub>4</sub> in CoFe@PCS

**Table S2** Comparison of microwave absorption performance of CoFe@PCS with other reported CoFe-based carbon EW absorbers

| Samples                                                                              | $R_L$<br>(dB) | Thickness<br>(mm) | Bandwidth<br>(GHz) | Loading<br>(wt%) | $SR_L$<br>(dB mg <sup>-1</sup> mm <sup>-1</sup> ) | Refs.     |
|--------------------------------------------------------------------------------------|---------------|-------------------|--------------------|------------------|---------------------------------------------------|-----------|
| CNT-CoFe@C-900                                                                       | -40.00        | 3.0               | 5.62               | 10%              | -133                                              | [S8]      |
| Co <sub>0.8</sub> Fe <sub>2.2</sub> O <sub>4</sub> /rGO                              | -51.20        | 2.1               | 5.7                | 30%              | -81                                               | [S9]      |
| CFs@H-Fe <sub>3</sub> O <sub>4</sub> /CoFe                                           | -40.85        | 3.5               | 2.14               | 30%              | -39                                               | [S10]     |
| Co <sub>0.2</sub> Fe <sub>2.8</sub> O <sub>4</sub>                                   | -43.45        | 3.0               | 5.58               | 30%              | -48                                               | [S11]     |
| CoFe@N-CNT/rGO                                                                       | -33.2         | 2.0               | 3.8                | 50%              | -33                                               | [S12]     |
| Co <sub>15</sub> Fe <sub>85</sub> @C/RGO-2                                           | -33.4         | 2.5               | 9.2                | 30%              | -44                                               | [S13]     |
| Fe-Co/NC/rGO                                                                         | -43.36        | 2.5               | 9.29               | 30%              | -57                                               | [S14]     |
| MWCNTs/FeCoNi@C                                                                      | -36           | 2.0               | 4.0                | 30%              | -60                                               | [S15]     |
| Fe-Co/NPC/RGO                                                                        | -52.9         | 2.5               | 3.1                | 30%              | -70                                               | [S16]     |
| CoFe <sub>2</sub> O <sub>4</sub> /FeCo                                               | -54.3         | 1.2               | 15.2               | 50%              | -90                                               | [S17]     |
| CoFe@C@MnO <sub>2</sub>                                                              | -64           | 1.3               | 9.2                | 30%              | -164                                              | [S18]     |
| ZnO/FeNiMo                                                                           | -28           | 1.5               | 4.54               | 30%              | -61                                               | [S19]     |
| rGO/CoFe <sub>2</sub> O <sub>4</sub>                                                 | -56.3         | 1.4               | 3.4                | 30%              | -134                                              | [S20]     |
| Co <sub>1-x</sub> Ni <sub>x</sub> Fe <sub>2</sub> O <sub>4</sub>                     | -37.66        | 2.1               | 2.64               | 30%              | -59                                               | [S21]     |
| CoFe <sub>0.26</sub> @Co@C                                                           | -62.5         | 1.5               | 14.7               | 30%              | -138                                              | [S22]     |
| CoFe <sub>2</sub> /BTO-1 HNFs                                                        | -82.4         | 1.2               | 5                  | 50%              | -137                                              | [S23]     |
| FeCoNi-MOF-74                                                                        | -64.75        | 2.1               | 8.08               | 38%              | -81                                               | [S24]     |
| Ba <sub>0.8</sub> Dy <sub>0.2</sub> Co <sub>2</sub> Fe <sub>16</sub> O <sub>27</sub> | -15           | 1.5               | 7                  | 30%              | -33                                               | [S25]     |
| Ni(Co/Zn/Cu)Fe <sub>2</sub> O <sub>4</sub> /SiC@SiO <sub>2</sub>                     | -32.76        | 3.0               | 2.1                | 30%              | -36                                               | [S26]     |
| CoFe@PCS-900                                                                         | -57.7         | 2.0               | 4.24               | 15%              | -192                                              | This work |

## Supplementary References

- [S1] F. Gándara, F.J. Uribe-Romo, D.K. Britt, H. Furukawa, L. Lei et al., Porous, conductive metal-triazolates and their structural elucidation by the charge-flipping method. *Chem. Eur. J.* **18**(34), 10595-10601 (2012). <https://doi.org/10.1002/chem.201103433>
- [S2] E. Cui, F. Pan, Z. Xiang, Z. Liu, L. Yu et al., Engineering dielectric loss of FeCo/polyvinylpyrrolidone core-shell nanochains@graphene oxide composites with excellent microwave absorbing properties. *Adv. Eng. Mater.* **23**(1), 2000827 (2020). <https://doi.org/10.1002/adem.202000827>
- [S3] J. Wang, L. Liu, S. Jiao, K. Ma, J. Lv et al., Hierarchical carbon fiber@MXene@MoS<sub>2</sub> core-sheath synergistic microstructure for tunable and efficient microwave absorption. *Adv. Funct. Mater.* **30**(45), 2002595 (2020). <https://doi.org/10.1002/adfm.202002595>
- [S4] X. Gao, X. Wu, J. Qiu, High electromagnetic waves absorbing performance of a multilayer-like structure absorber containing activated carbon hollow porous fibers–carbon nanotubes and Fe<sub>3</sub>O<sub>4</sub> nanoparticles. *Adv. Electron. Mater.* **4**(5), 1700565 (2018). <https://doi.org/10.1002/aelm.201700565>
- [S5] P. Liu, Y. Zhang, J. Yan, Y. Huang, L. Xia et al., Synthesis of lightweight N-doped graphene foams with open reticular structure for high-efficiency electromagnetic wave absorption. *Chem. Eng. J.* **368**, 285-298 (2019). <https://doi.org/10.1016/j.cej.2019.02.193>
- [S6] F. Pan, Z. Liu, B. Deng, Y. Dong, X. Zhu et al., Lotus leaf-derived gradient hierarchical porous C/MoS<sub>2</sub> morphology genetic composites with wideband and tunable electromagnetic absorption performance. *Nano-Micro Lett.* **13**, 43 (2021). <https://doi.org/10.1007/s40820-020-00568-1>
- [S7] C. Wu, Z. Chen, M. Wang, X. Cao, Y. Zhang et al., Confining tiny MoO<sub>2</sub> clusters into reduced graphene oxide for highly efficient low frequency microwave absorption. *Small* **16**(30), 2001686 (2020). <https://doi.org/10.1002/sml.202001686>
- [S8] Y. Wang, H. Wang, J. Ye, L. Shi, X. Feng, Magnetic CoFe alloy@C nanocomposites derived from ZnCo-MOF for electromagnetic wave absorption. *Chem. Eng. J.* **383**, 123096 (2019). <https://doi.org/10.1016/j.cej.2019.123096>
- [S9] W. Shen, B. Ren, K. Cai, Y. Song, W. Wang, Synthesis of nonstoichiometric Co<sub>0.8</sub>Fe<sub>2.2</sub>O<sub>4</sub>/reduced graphene oxide (rGO) nanocomposites and their excellent electromagnetic wave absorption property. *J. Alloys Compd.* **774**, 997-1008 (2019). <https://doi.org/10.1016/j.jallcom.2018.09.361>
- [S10] P. Yin, L. Zhang, J. Wang, X. Feng, J. Dai et al., Facile preparation of cotton-derived carbon fibers loaded with hollow Fe<sub>3</sub>O<sub>4</sub> and CoFe NPs for significant low-frequency electromagnetic absorption. *Powder Technol.* **380**, 134-142 (2021). <https://doi.org/10.1016/j.powtec.2020.11.044>
- [S11] Y. Wang, Y. Zhang, J. Tao, W. Sun, M. Liu et al., Co<sub>0.2</sub>Fe<sub>2.8</sub>O<sub>4</sub>/C composite nanofibers with designable 3D hierarchical architecture for high-performance electromagnetic wave absorption. *Ceram. Int.* **47**(16), 23275-23284 (2021). <https://doi.org/10.1016/j.ceramint.2021.05.040>
- [S12] X. Zhang, Z. Zhao, J. Xu, X. Ouyang, C. Zhu et al., N-doped carbon nanotube arrays on reduced graphene oxide as multifunctional materials for energy devices and



- absorption of electromagnetic wave. *Carbon* **177**, 216-225 (2021).  
<https://doi.org/10.1016/j.carbon.2021.02.085>
- [S13] S. Bao, W. Tang, Z. Song, Q. Jian, Z. Jiang et al., Synthesis of sandwich-like  $\text{Co}_{15}\text{Fe}_{85}@C/\text{RGO}$  multicomponent composites with tunable electromagnetic parameters and microwave absorption performance. *Nanoscale* **12**(36), 18790-18799 (2020). <https://doi.org/10.1039/D0NR04615A>
- [S14] S. Wang, Y. Xu, R. Fu, H. Zhu, Q. Jiao et al., Rational construction of hierarchically porous Fe–Co/N-doped carbon/rGO composites for broadband microwave absorption. *Nano-Micro Lett.* **11**, 76 (2019). <https://doi.org/10.1007/s40820-019-0307-8>
- [S15] O. Mirzaee, I. Huynen, M. Zarajnejad, Electromagnetic wave absorption characteristics of single and double layer absorbers based on trimetallic  $\text{FeCoNi}@C$  metal–organic framework incorporated with MWCNTs. *Synth. Met.* **271**, 116634 (2021). <https://doi.org/10.1016/j.synthmet.2020.116634>
- [S16] Y. Wang, X. Gao, C. Lin, L. Shi, X. Li et al., Metal organic frameworks-derived Fe–Co nanoporous carbon/graphene composite as a high-performance electromagnetic wave absorber. *J. Alloys Compd.* **785**, 765-773 (2019).  
<https://doi.org/10.1016/j.jallcom.2019.01.271>
- [S17] X. Su, J. Wang, X. Zhang, S. Huo, W. Chen et al., One-step preparation of  $\text{CoFe}_2\text{O}_4/\text{FeCo}/\text{graphite}$  nanosheets hybrid composites with tunable microwave absorption performance. *Ceram. Int.* **46**(8), 12353-12363 (2020).  
<https://doi.org/10.1016/j.ceramint.2020.01.286>
- [S18] Y. Zhang, Z. Yang, M. Li, L. Yang, J. Liu et al., Heterostructured  $\text{CoFe}@C@\text{MnO}_2$  nanocubes for efficient microwave absorption. *Chem. Eng. J.* **382**, 123039 (2019).  
<https://doi.org/10.1016/j.cej.2019.123039>
- [S19] L. Zheng, H. Zhu, M. Li, Preparation and application in electromagnetic absorption of  $\text{ZnO}/\text{FeNiMo}$  composite. *Rare Met.* **33**(5), 573-577 (2013).  
<https://doi.org/10.1007/s12598-013-0146-6>
- [S20] H. Zong, H. Yang, J. Dong, L. Ma, Y. Lin et al., Construction of a three-dimensional  $\text{rGO}/\text{CoFe}_2\text{O}_4$  nanorods composite with enhanced microwave absorption performance. *J. Mater. Sci. Mater. Electron.* **31**(21), 18590-18604 (2020).  
<https://doi.org/10.1007/s10854-020-04402-7>
- [S21] Z. Tong, Q. Yao, J. Feng, L. Cheng, T. Chuang et al., Effects of Ni-doping on microstructure, magnetic and microwave absorption properties of  $\text{CoFe}_2\text{O}_4$ . *Mater. Sci. Eng. B* **268**, 115092 (2021). <https://doi.org/10.1016/j.mseb.2021.115092>
- [S22] B. Wang, W. Ruan, C. Mu, A. Nie, F. Wen et al., Direct one-step synthesis of  $\text{CoFex}@C$  hybrids derived from a metal organic framework for a lightweight and high-performance microwave absorber. *Nanotechnology* **31**(9), 95703 (2020).  
<https://doi.org/10.1088/1361-6528/ab5620>
- [S23] G. Guan, G. Gao, J. Xiang, J. Yang, L. Gong et al.,  $\text{CoFe}_2/\text{BaTiO}_3$  hybrid nanofibers for microwave absorption. *ACS Appl. Nano Mater.* **3**(8), 8424-8437 (2020).  
<https://doi.org/10.1021/acsanm.0c01855>
- [S24] J. Quyang, Z. He, Y. Zhang, H. Yang, Q. Zha, Trimetallic  $\text{FeCoNi}@C$  nanocomposite hollow spheres derived from metal–organic frameworks with superior electromagnetic wave absorption ability. *ACS Appl. Nano Mater. Interfaces* **11**(42), 39304-39314 (2019). <https://doi.org/10.1021/acsnami.9b11430>

- [S25] L. Wang, X. Hang, J. Zhang, H. Wang, Q. Zhang et al., Microstructure and microwave electromagnetic properties of Dy<sup>3+</sup>-doped W-type hexaferrites. *Rare Met.* **30**(5),505-509 (2021). <https://doi.org/10.1007/s12598-011-0420-4>
- [S26] P. Wang, P. Liu, S. Ye, Preparation and microwave absorption properties of Ni(Co/Zn/Cu)Fe<sub>2</sub>O<sub>4</sub>/SiC@SiO<sub>2</sub> composites. *Rare Met.* **38**(1), 59-63 (2016). <https://doi.org/10.1007/s12598-016-0752-1>
